# Supplementary material for: CD169+ macrophage intrinsic IL-10 production regulates immune homeostasis during sepsis
Source: PubMed Central journal article supplement — Cell Rep. Author manuscript; Available in PMC 2023 Apr 24. (PMC10123955; doi:10.1016/j.celrep.2023.112171), 2023-03-02
Supplement: NIHMS1887274-supplement-1.pdf [file NIHMS1887274-supplement-1.pdf]

**Cell Reports, Volume 42**

**Supplemental information**

**CD169+ macrophage intrinsic IL-10 production  
regulates immune homeostasis during sepsis**

**Stephen T. Yeung, Luis J. Ovando, Ashley J. Russo, Vijay A. Rathinam, and Kamal M. Khanna**

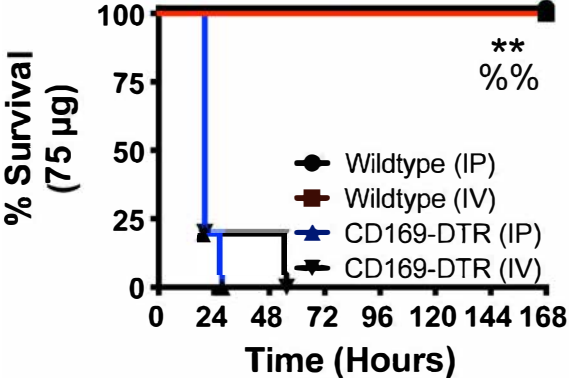

Supplementary Figure 1

**Supplemental Figure 1 – Splenic CD169+ macrophages and not liver macrophages are critical for LPS sensitivity.**

Survival curve of WT (black) vs CD169-DTR (red) mice given DT either intravenously or intraperitoneally followed by 75 µg of *E.coli* O111:B4 Phenol LPS. \*\* p<0.01 and % p<0.01.

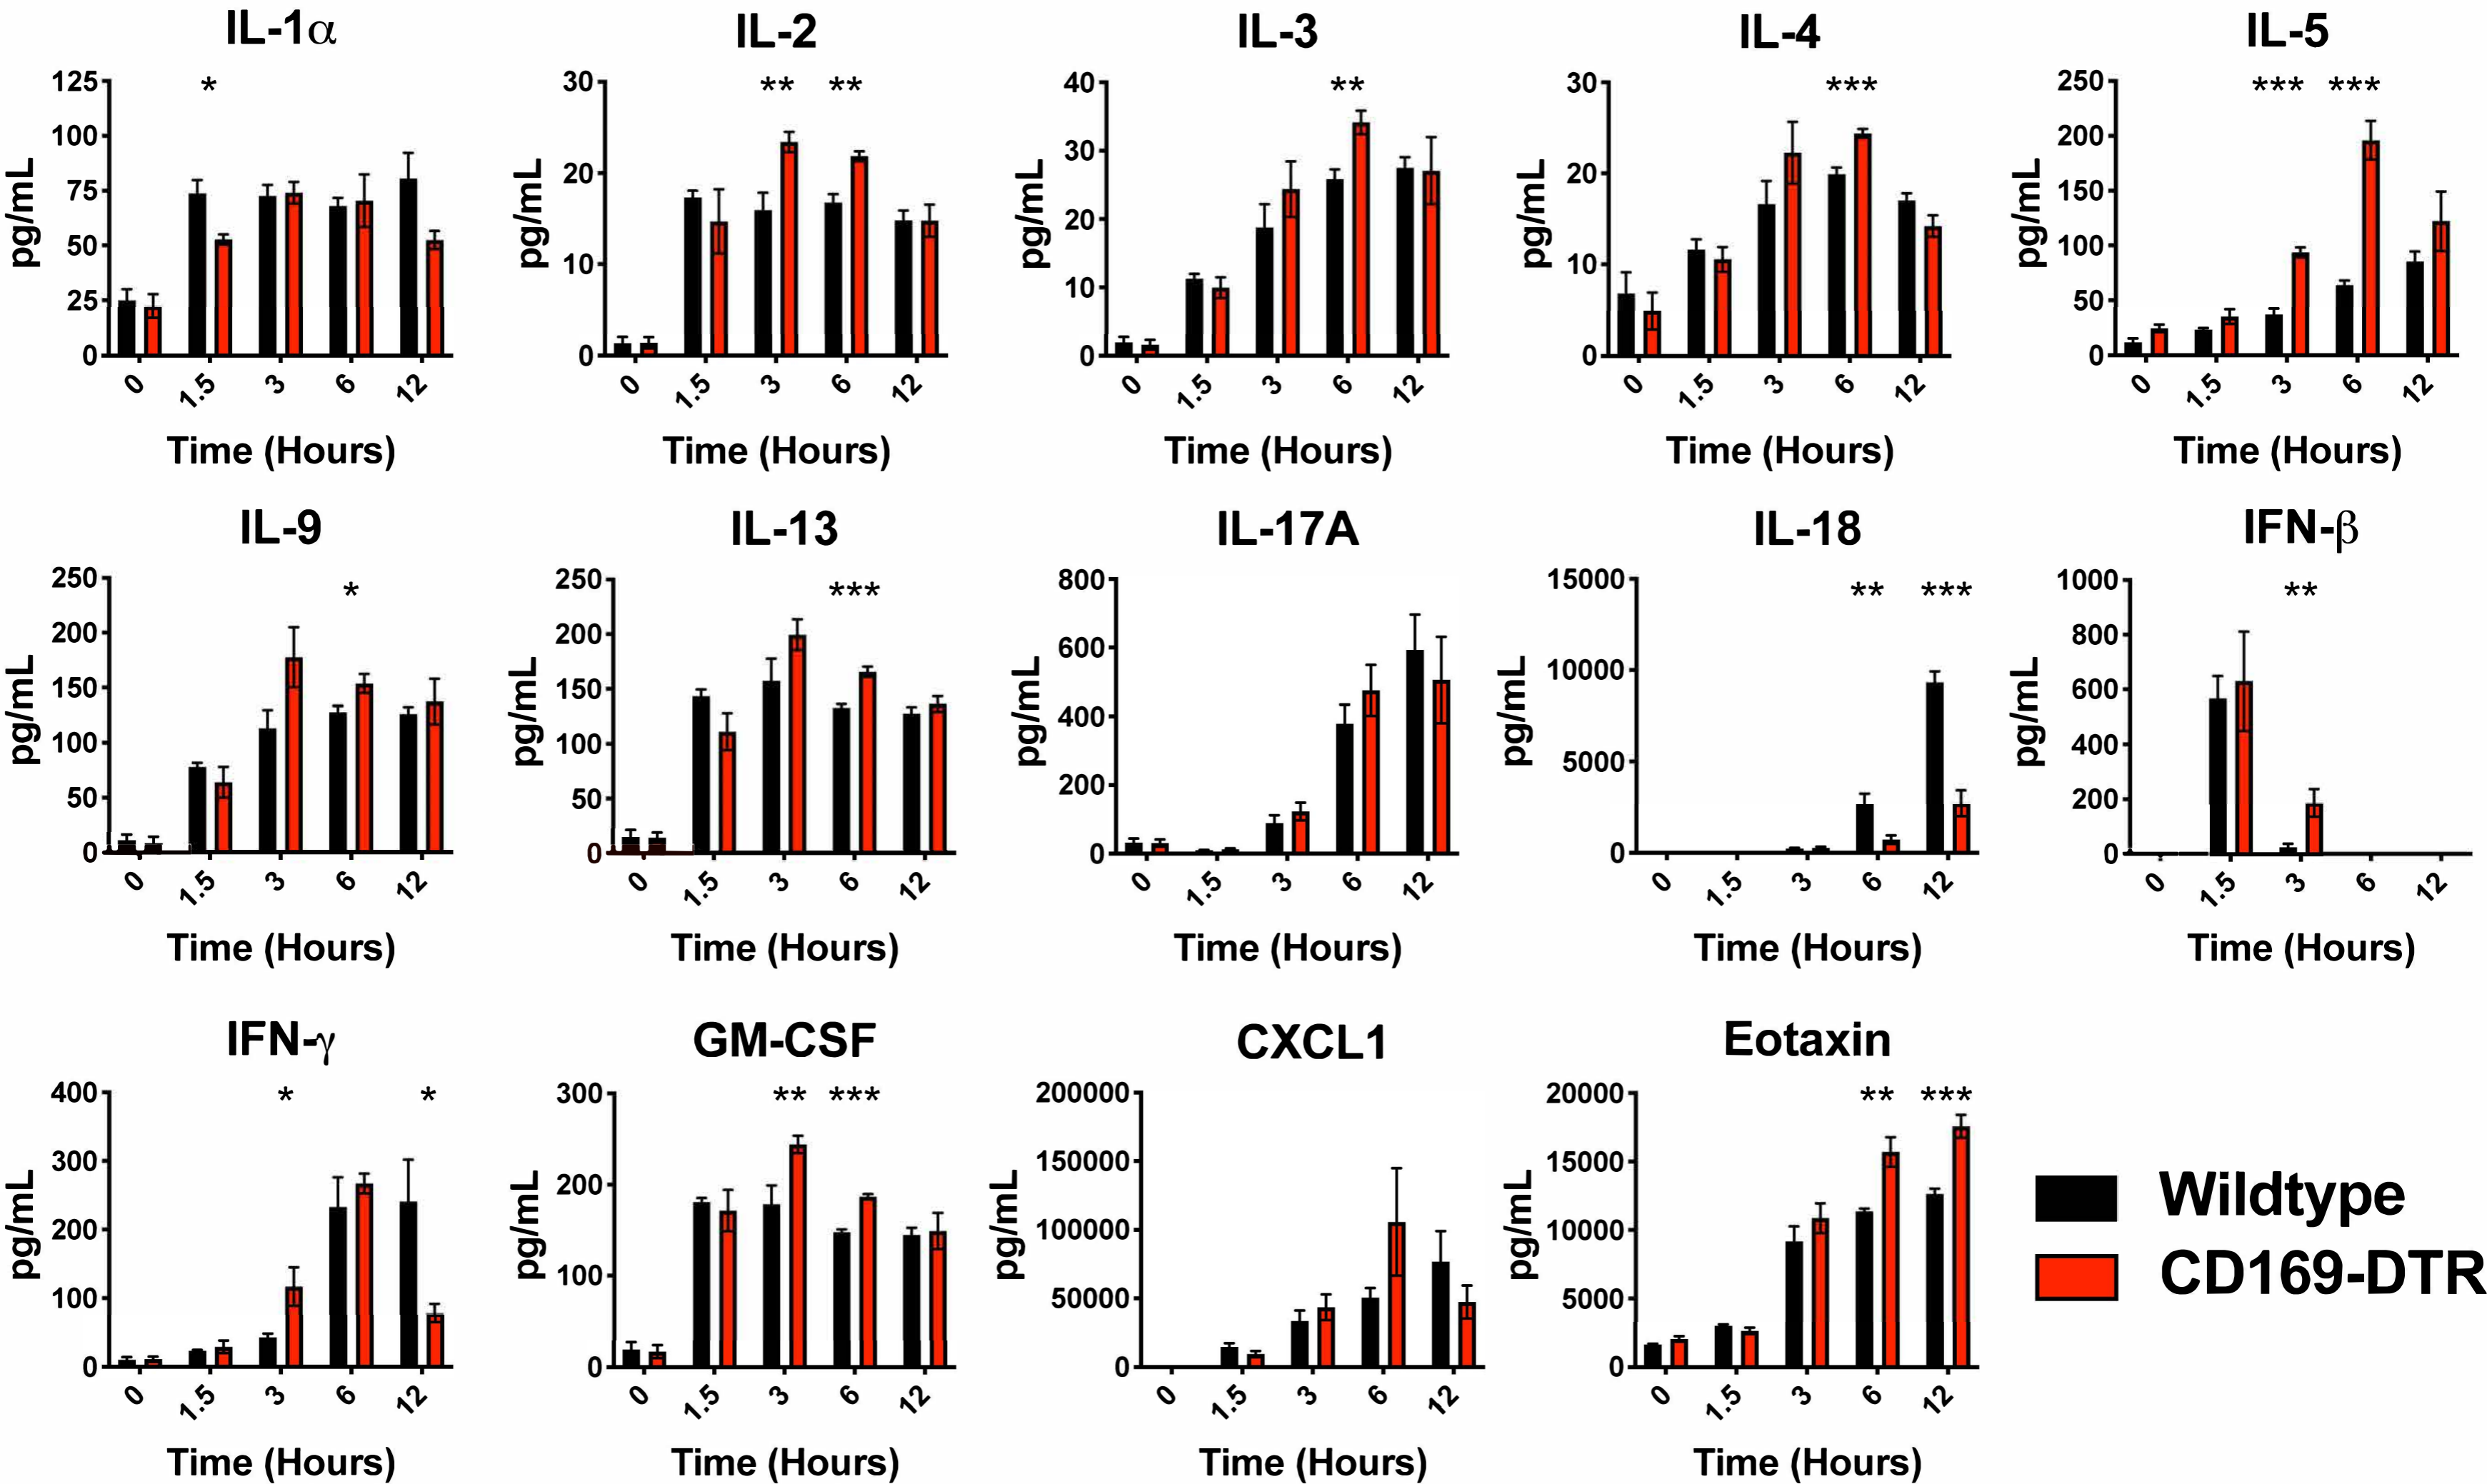

Supplementary Figure 2

**Supplemental Figure 2 – Serum cytokine and chemokines following LPS shock.**

Cytokines and chemokines levels between WT (black) and CD169-DTR (red) mice challenged with 75 µg of lipopolysaccharide from *Escherichia coli* O111:B4 i.p. IL-1 $\alpha$ , IL-2, IL-3, IL-4, IL-5, IL-9, IL-13, IL-17A, IL-18, IFN- $\beta$ , IFN-g, GM-CSF, CXCL1, and Eotaxin. \* p<0.05, \*\* p<0.01, \*\*\* p<0.001.
